# Supplementary material for: Pressurized carbonization of mixed plastics into porous carbon sheets on magnesium oxide
Source: Royal Society of Chemistry journal article supplement (doi:10.1039/c7ra12733b), 2018-01-01
Supplement: c7ra12733b1.pdf [file c7ra12733b1.pdf]

## Supporting Information

### Pressurized carbonization of mixed plastics into porous carbon sheets on magnesium oxide

Jiali Ma,<sup>a,b</sup> Jie Liu,<sup>b,\*</sup> Jiangfeng Song,<sup>a,\*</sup> Tao Tang<sup>b,\*</sup>

**Table S1.** Compounds of the liquid products from carbonization of the mixed plastics and MgO at 500 °C in relation to reaction time.

| Elution time (min) | Substance                                                                                                     | Portion of the total chromatographic peak area (%) |        |       |        |
|--------------------|---------------------------------------------------------------------------------------------------------------|----------------------------------------------------|--------|-------|--------|
|                    |                                                                                                               | 0 min                                              | 30 min | 60min | 90 min |
| 2.012              | Benzene,                     | 0                                                  | 2.221  | 0     | 0      |
| 2.883              | Toluene,                    | 0                                                  | 6.583  | 0     | 0      |
| 4.346              | Ethylbenzene,              | 0                                                  | 5.259  | 0     | 0      |
| 4.477              | 1,3-Dimethylbenzene,       | 0                                                  | 4.754  | 0     | 0      |
| 4.877              | Styrene,                   | 0                                                  | 2.511  | 0     | 0      |
| 6.196              | 1-Ethyl-3methylbenzene,    | 0                                                  | 0.941  | 0     | 0      |
| 6.314              | 1, 2, 4-Trimethylbenzene,  | 0                                                  | 0.664  | 0     | 0      |
| 6.570              | Methylstyrene,             | 0                                                  | 0.762  | 0     | 0      |
| 6.687              | 1-Decene, C <sub>10</sub> H <sub>20</sub>                                                                     | 0                                                  | 0.171  | 0     | 0      |
| 8.457              | Undecene, C <sub>11</sub> H <sub>22</sub>                                                                     | 4.451                                              | 0      | 0     | 0      |
| 8.587              | Undecane, C <sub>11</sub> H <sub>24</sub>                                                                     | 0.144                                              | 0      | 0     | 0      |
| 8.611              | Indene                     | 0                                                  | 0.681  | 0.308 | 0      |
| 9.493              | 3-Methylindene,            | 0.641                                              | 0      | 0.908 | 0      |

|        |                                                                                                                          |       |        |       |       |
|--------|--------------------------------------------------------------------------------------------------------------------------|-------|--------|-------|-------|
| 9.937  | Decadiene, C <sub>10</sub> H <sub>18</sub>                                                                               | 0.201 | 0      | 0     | 0     |
| 10.094 | Naphthalene, 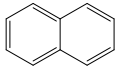                           | 3.607 | 16.763 | 17.6  | 0     |
| 11.430 | Tridecadiene, C <sub>13</sub> H <sub>24</sub>                                                                            | 1.377 | 0.045  | 0.056 | 0     |
| 11.539 | 1-Tridecene, C <sub>13</sub> H <sub>26</sub>                                                                             | 2.493 | 0.271  | 0.473 | 0.252 |
| 11.653 | Tridecene, C <sub>13</sub> H <sub>28</sub>                                                                               | 1.169 | 0.114  | 0.212 | 0.146 |
| 11.731 | 2-Methyl-naphthalene,                   | 4.635 | 6.403  | 9.776 | 1.867 |
| 11.87  | 1-Tetradecene, C <sub>14</sub> H <sub>28</sub>                                                                           | 4.284 | 0      | 0     | 0     |
| 12.898 | Biphenyl, <br>3-Cyclohexen-1-yl-benzene | 0     | 7.246  | 10    | 0     |
| 12.922 |                                         | 0.24  | 0      | 0     | 9.449 |
| 13.011 | Tetradecane, C <sub>14</sub> H <sub>30</sub>                                                                             | 1.543 | 0      | 0.445 | 0     |
| 13.438 | 1,7-Dimethylnaphthalene,                | 0.719 | 1.99   | 2.432 | 0.834 |
| 13.586 | Biphenylmethane,                       | 0.535 | 0      | 0.839 | 0.933 |
| 13.819 | 1-Hexadecene, C <sub>16</sub> H <sub>32</sub>                                                                            | 3.222 | 0      | 0.541 | 0     |
| 14.187 | 1-Pentadecene, C <sub>15</sub> H <sub>30</sub>                                                                           | 2.566 | 0.445  | 0.538 | 0     |
| 14.257 | <br>3-methyl-1,1'-Biphenyl            | 0.205 | 0.686  | 2.499 | 4.852 |
| 14.265 | 4-methyl-1,1'-Biphenyl,               | 0     | 2.234  | 1.445 | 0     |
| 14.283 | 10-Methyl-eicosane, C <sub>21</sub> H <sub>44</sub>                                                                      | 1.448 | 0      | 0     | 0     |
| 14.829 | 2,6,10-trimethyl-Tetradecane, C <sub>17</sub> H <sub>36</sub>                                                            | 1.584 | 0.847  | 0.416 | 0.217 |
| 14.977 | 1-Heptadecene, C <sub>17</sub> H <sub>34</sub>                                                                           | 3.08  | 0.575  | 0.576 | 0.897 |
| 15.310 | 1,9-Tetradecadiene, C <sub>14</sub> H <sub>26</sub>                                                                      | 0.55  | 0      | 0     | 0     |
| 15.345 | 2-Ethyl-1,1'-Biphenyl,                | 0     | 0.263  | 0.28  | 1.236 |
| 15.476 | Hexadecane, C <sub>16</sub> H <sub>34</sub>                                                                              | 1.738 | 0.417  | 0     | 0.194 |
| 15.510 | Fluorene,                             | 0.801 | 1.447  | 3.092 | 4.24  |
| 16.074 | 1-Octadecene, C <sub>18</sub> H <sub>36</sub>                                                                            | 0     | 0.433  | 0     | 0.413 |
| 16.268 | 7-phenyl-Bicyclo[4.2.1]nona-2,4,7-                                                                                       | 2.592 | 0.622  | 0.239 | 0     |

|        |                                                                                                             |       |       |       |        |
|--------|-------------------------------------------------------------------------------------------------------------|-------|-------|-------|--------|
|        | 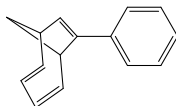<br>triene,                |       |       |       |        |
| 16.817 | <br>9-methyl-9H-Fluorene,  | 0     | 1.473 | 1.764 | 1.236  |
| 17.688 | Octadecane, C <sub>18</sub> H <sub>38</sub>                                                                 | 1.211 | 0.47  | 0.31  | 0      |
| 17.766 | <br>Anthracene,            | 1.759 | 4.665 | 7.034 | 15.721 |
|        | 9,10-dihydro-9,10-dimethyl-Anthracene,                                                                      |       |       |       |        |
| 17.879 |                            | 0.831 | 1.272 | 0     | 0      |
| 18.533 | <br>1-phenyl-Naphthalene,  | 0.949 | 2.268 | 2.236 | 4.41   |
|        | 2-phenyl-1H-Indene,                                                                                         |       |       |       |        |
| 18.611 |                          | 1.492 | 0     | 0.901 | 0.928  |
| 18.646 | 1-Nonadecene, C <sub>19</sub> H <sub>38</sub>                                                               | 5.428 | 2.341 | 1.203 | 0      |
| 18.707 | Nonadacene, C <sub>19</sub> H <sub>40</sub>                                                                 | 1.415 | 0     | 0     | 0.197  |
|        | 1,3-Diphenyl-3-methylcyclopropene,                                                                          |       |       |       |        |
| 18.950 |                          | 0.928 | 0     | 0     | 0      |
| 18.959 |                          | 0     | 0.932 | 0.94  | 0.475  |
| 19.203 |                          | 0.458 | 0.731 | 0.582 | 0.91   |
| 19.630 | 1-Eicosene, C <sub>20</sub> H <sub>40</sub>                                                                 | 1.422 | 0.609 | 0.352 | 0      |
| 19.691 | <br>2-Phenylnaphthalene, | 4.139 | 5.506 | 5.794 | 15.884 |
| 19.874 |                          | 1.081 | 0.495 | 1.383 | 0.648  |
| 20.57  | 1-Docosene, C <sub>22</sub> H <sub>44</sub>                                                                 | 3.365 | 1.315 | 0.507 | 0      |

|        |                                                                                                        |        |       |       |        |
|--------|--------------------------------------------------------------------------------------------------------|--------|-------|-------|--------|
| 20.588 | Fluoranthene, 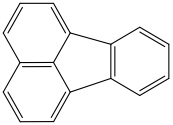        | 0      | 0     | 1.365 | 0      |
| 20.614 | Tricosane, C <sub>23</sub> H <sub>48</sub>                                                             | 1.524  | 0     | 0     | 0.822  |
| 20.657 | Hexacosene, C <sub>26</sub> H <sub>52</sub>                                                            | 0.667  | 0.381 | 0     | 0      |
| 20.794 |                       | 0      | 1.026 | 0.933 | 1.483  |
| 21.284 |                       | 0.313  | 0.631 | 0.151 | 0.49   |
| 21.311 |                       | 0      | 0     | 0.705 | 0      |
| 21.511 | Octacosane, C <sub>28</sub> H <sub>56</sub>                                                            | 1.401  | 0     | 0     | 3.317  |
| 21.964 |                       | 0      | 0     | 1.531 | 1.967  |
| 21.972 |                      | 0.419  | 0     | 0.436 | 1.276  |
| 22.376 | Heptacosane, C <sub>27</sub> H <sub>56</sub>                                                           | 13.321 | 4.725 | 4.697 | 0      |
| 22.329 | Tricosene, C <sub>23</sub> H <sub>46</sub>                                                             | 1.773  | 0.451 | 0.538 | 0      |
| 23.157 | C <sub>24</sub> H <sub>49</sub> OH                                                                     | 1.997  | 0     | 0     | 0      |
| 23.621 | Pyrene,             | 0.752  | 1.103 | 2.839 | 6.442  |
| 23.949 | Pentacosene, C <sub>25</sub> H <sub>50</sub>                                                           | 1.379  | 0     | 0     | 6.346  |
| 24.080 | Benanthracene,      | 0      | 0     | 2.953 | 0      |
| 24.716 | 1-Heptacosene, C <sub>27</sub> H <sub>54</sub>                                                         | 1.417  | 0     | 0     | 0      |
| 26.370 | C <sub>35</sub> H <sub>70</sub>                                                                        | 5.367  | 2.835 | 3.742 | 0      |
| 27.372 | C <sub>44</sub> H <sub>90</sub>                                                                        | 2.839  | 0.408 | 0     | 0.809  |
| 27.381 | Benzofluoranthene,  | 0      | 0.262 | 1.921 | 0      |
| 27.413 |                     | 0      | 0     | 0     | 15.447 |

---

28.121

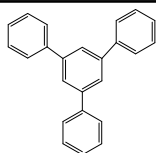

0

0.19

0.335

0

1,3,5-Triphenylbenzene,

---
